# Supplementary material for: PPARγ activation serves as therapeutic strategy against bladder cancer via inhibiting PI3K-Akt signaling pathway
Source: PubMed Central journal article supplement (PMC6407222; doi:10.1186/s12885-019-5426-6), 2019-03-07
Supplement: 12885_2019_5426_MOESM1_ESM.pdf [file 12885_2019_5426_MOESM1_ESM.pdf]

**Supplementary table.** The information of Human bladder cancer cases used in tissue microarray (TMA)

| Case No. | Tissue code     | Age range (year) | Survival time range (year) | Survival state | Tumor size              | TNM Stage |     |    | AJCC Stage |
|----------|-----------------|------------------|----------------------------|----------------|-------------------------|-----------|-----|----|------------|
|          |                 |                  |                            |                |                         | T         | N   | M  |            |
| 1        | RUrBla0706A0036 | 70-80            | 5.0-6.0                    | Live           | 7*4*2.5cm               | T2        | N/A | M0 | N/A        |
| 2        | RUrBla0706A0037 | 80-90            | 6.0-7.0                    | Live           | 6.5*6.5*1.5cm           | T3        | N0  | M0 | 3          |
| 3        | RUrBla0706A0038 | 60-70            | 2.0-3.0                    | Dead           | 2.5*2*0.2cm             | T2        | N0  | M0 | 2          |
| 4        | RUrBla0706A0039 | 60-70            | 2.0-3.0                    | Dead           | 4*3.5*1.5cm             | T2        | N0  | M0 | 4          |
| 5        | RUrBla0706A0040 | 50-60            | 0.5-1.0                    | Dead           | 5*2.5*1.5cm             | T2        | N0  | M0 | 2          |
| 6        | RUrBla0710A0043 | 60-70            | 1.0-2.0                    | Dead           | 3*3*1cm                 | T1        | N0  | M0 | 1          |
| 7        | RUrBla0710A0044 | 40-50            | 0-0.5                      | Dead           | 4.5*4*1.5cm             | T2        | N0  | M0 | 4          |
| 8        | RUrBla0710A0045 | 50-60            | 0.5-1.0                    | Dead           | 3*2*1cm,<br>1*1*0.5cm   | T1        | N/A | M0 | N/A        |
| 9        | RUrBla0711A0051 | 80-90            | 5.0-6.0                    | Live           | 9*7*2cm                 | Tis       | N0  | M0 | 0is        |
| 10       | RUrBla0712A0058 | 40-50            | 0-0.5                      | Dead           | 7*6*6cm                 | T3        | N/A | M0 | N/A        |
| 11       | RUrBla0712A0059 | 70-80            | 4.0-5.0                    | Live           | 2*1*0.9cm               | T2        | N0  | M0 | 2          |
| 12       | RUrBla0712A0060 | 80-90            | 5.0-6.0                    | Dead           | 2*2*1cm,<br>1.5*1.5*1cm | T1        | N0  | M0 | 1          |
| 13       | RUrBla0712A0061 | 60-70            | 1.0-2.0                    | Dead           | 2*2*1cm                 | T3        | N0  | M0 | 3          |
| 14       | RUrBla0803A0066 | 70-80            | 4.0-5.0                    | Dead           | 6*6*1cm                 | T4a       | N0  | M0 | 4          |
| 15       | RUrBla0804A0068 | 60-70            | 1.0-2.0                    | Dead           | 1.5*1*0.5cm,<br>2*2*2cm | T1        | N/A | M0 | N/A        |
| 16       | RUrBla0806A0071 | 80-90            | 5.0-6.0                    | Live           | 5*4*2.5cm               | T2        | N0  | M0 | 2          |
| 17       | RUrBla0807A0074 | 60-70            | 1.0-2.0                    | Dead           | 2*1.5*0.5cm             | T3        | N0  | M0 | 3          |
| 18       | RUrBla0807A0075 | 70-80            | 4.0-5.0                    | Live           | 2*1.8*1cm               | T3        | N0  | M0 | 3          |
| 19       | RUrBla0807A0076 | 50-60            | 0.5-1.0                    | Dead           | 5*4.8*3cm               | T3        | N/A | M0 | N/A        |
| 20       | RUrBla0808A0078 | 80-90            | 5.0-6.0                    | Live           | 3*2*1cm                 | T2        | N0  | M0 | 2          |
| 21       | RUrBla0808A0079 | 70-80            | 4.0-5.0                    | Live           | 5*3*1cm                 | T1        | N0  | M0 | 1          |
| 22       | RUrBla0811A0083 | 70-80            | 5.0-6.0                    | Live           | 4*3.5*2.5cm             | T2        | N0  | M0 | 2          |
| 23       | RUrBla0812A0084 | 70-80            | 5.0-6.0                    | Live           | 5*4.5*3cm               | T2        | N0  | M0 | 2          |
| 24       | RUrBla0901A0088 | 70-80            | 5.0-6.0                    | Live           | 4*2*1.5cm               | T3        | N/A | M0 | N/A        |
| 25       | RUrBla0901A0090 | 50-60            | 0.5-1.0                    | Dead           | 2*2*2cm,<br>3*3*2.5cm   | T3        | N0  | M0 | 4          |
| 26       | RUrBla0901A0091 | 70-80            | 5.0-6.0                    | Live           | 5*3*3cm                 | T3        | N0  | M0 | 3          |
| 27       | RUrBla0902A0095 | 70-80            | 5.0-6.0                    | Live           | 6*6*5.5cm               | T2        | N/A | M0 | N/A        |
| 28       | RUrBla0904A0097 | 70-80            | 3.0-4.0                    | Live           | 7*6.5*1cm               | Tis       | N0  | M0 | 0is        |
| 29       | RUrBla0905A0102 | 60-70            | 0.5-1.0                    | Dead           | 1.7*1.5*1cm             | T1        | N/A | M0 | N/A        |
| 30       | RUrBla0906A0103 | 70-80            | 4.0-5.0                    | Dead           | 5*3.5*2cm               | T1        | N0  | M0 | 1          |
| 31       | F03A0105        | 50-60            | 0.5-1.0                    | Dead           | 5*5*3cm                 | T3        | N0  | M0 | 3          |
| 32       | F03A0108        | 70-80            | 4.0-5.0                    | Live           | 4*3.5*3.5cm             | T3        | N0  | M0 | 3          |
| 33       | F03A0110        | 50-60            | 0-0.5                      | Dead           | 4*3*1.5cm               | T3        | N0  | M0 | 3          |
| 34       | F03A0112        | 50-60            | 0-0.5                      | Dead           | 3*3*1.5cm               | T4a       | N/A | M0 | 4          |

|    |          |       |         |      |                         |     |     |    |     |
|----|----------|-------|---------|------|-------------------------|-----|-----|----|-----|
| 35 | F03A0120 | 70-80 | 3.0-4.0 | Dead | 5*5*1.5cm               | T3  | N0  | M0 | 3   |
| 36 | F03A0121 | 70-80 | 4.0-5.0 | Live | 4*3.5*1cm               | T3  | N0  | M0 | 3   |
| 37 | F03A0122 | 70-80 | 2.0-3.0 | Live | 3*2.5*0.9cm             | T3  | N0  | M0 | 3   |
| 38 | F03A0123 | 70-80 | 4.0-5.0 | Live | 2*2*1cm                 | T3  | N0  | M0 | 3   |
| 39 | F03A0124 | 40-50 | 0-0.5   | Dead | 6*5.5*1.5cm             | T3  | N0  | M0 | 4   |
| 40 | F03A0126 | 60-70 | 2.0-3.0 | Dead | N/A                     | N/A | N/A | M0 | N/A |
| 41 | F03A0137 | 70-80 | 2.0-3.0 | Live | 2.5*2.5*1cm             | Tis | N/A | M0 | N/A |
| 42 | F03A0127 | 70-80 | 4.0-5.0 | Live | N/A                     | N/A | N/A | M0 | N/A |
| 43 | F03A0131 | 60-70 | 1.0-2.0 | Dead | 3*2*2cm                 | T3  | N/A | M0 | N/A |
| 44 | F03A0133 | 70-80 | 3.0-4.0 | Live | 8*5*2.5cm               | T1  | N0  | M0 | 1   |
| 45 | F03A0134 | 70-80 | 3.0-4.0 | Dead | 7*6*6cm                 | T1  | N0  | M0 | 1   |
| 46 | F03A0141 | 60-70 | 2.0-3.0 | Live | 4.5*2.5*1cm             | Tis | N0  | M0 | 0is |
| 47 | F03A0216 | 60-70 | 1.0-2.0 | Dead | 4*3*2cm                 | T3  | N0  | M0 | 3   |
| 48 | F03A0218 | 70-80 | 3.0-4.0 | Live | 3.5*2.5*1.5cm           | T2  | N0  | M0 | 4   |
| 49 | F03A0219 | 70-80 | 3.0-4.0 | Live | 3*2*1.5cm               | Tis | N/A | M0 | N/A |
| 50 | F03A0220 | 70-80 | 3.0-4.0 | Live | 4*3*1.5cm               | T2  | N0  | M0 | 2   |
| 51 | F03A0221 | 60-70 | 1.0-2.0 | Live | 3.5*3*1.5cm             | T3  | N0  | M0 | 3   |
| 52 | F03A0222 | 50-60 | 0.5-1.0 | Dead | 3*3*1.5cm               | T3  | N0  | M0 | 3   |
| 53 | F03A0224 | 60-70 | 1.0-2.0 | Live | 1.5*1.5*1cm,<br>2*2*1cm | T1  | N/A | M0 | N/A |
| 54 | F03A0230 | 60-70 | 1.0-2.0 | Live | 3*2*1cm                 | T2  | N0  | M0 | 2   |
| 55 | F03A0231 | 50-60 | 0.5-1.0 | Dead | 3*2.5*1.5cm             | T3  | N0  | M0 | 3   |
| 56 | F03A0347 | 60-70 | 2.0-3.0 | Live | 6*5*3cm                 | T2  | N0  | M0 | 2   |

Note: TNM, TNM Classification of Malignant Tumors; AJCC, American Joint Committee on Cancer; N/A, not applicable or unknown.
